# Supplementary material
Source: Springer Nature journal article supplement (https://www.springermedizin.de/resource/supplementary/12984_2006_113_MOESM3_ESM.pdf/9605332)
Supplement: MOESM3 [file 9605332]

**Table1** The pupil parameters and scores of questionnaire obtained before video presentation (control), and after video presentation (movies A, D and R).

|                | <b>D1</b>     | <b>D2</b>     | <b>CR</b>     | <b>latency</b> | <b>vc</b>   | <b>vd</b>   | <b>ac</b>   | <b>peak time</b> | <b>score of questionnaire</b> |
|----------------|---------------|---------------|---------------|----------------|-------------|-------------|-------------|------------------|-------------------------------|
| <b>control</b> | 6.62 ± 0.89   | 5.25 ± 1.03   | 0.21 ± 0.07   | 303 ± 29       | 3.99 ± 1.29 | 1.14 ± 0.36 | 32.1 ± 11.3 | 1.10 ± 0.24      | 32.4 ± 10.2                   |
| <b>movie A</b> | 5.95 ± 0.98** | 4.48 ± 1.06** | 0.25 ± 0.09*  | 304 ± 28       | 4.33 ± 1.27 | 1.14 ± 0.42 | 34.8 ± 12.7 | 1.10 ± 0.27      | 36.1 ± 10.3*                  |
| <b>movie D</b> | 6.08 ± 0.92** | 4.54 ± 0.93** | 0.26 ± 0.08** | 300 ± 32       | 4.35 ± 1.11 | 1.16 ± 0.48 | 32.3 ± 9.6  | 1.10 ± 0.20      | 38.0 ± 14.1**                 |
| <b>movie R</b> | 6.15 ± 0.86** | 4.77 ± 0.92** | 0.23 ± 0.08   | 306 ± 33       | 4.02 ± 1.37 | 1.10 ± 0.43 | 32.2 ± 11.5 | 1.06 ± 0.18      | 36.7 ± 11.3*                  |
